# Supplementary material
Source: PubMed Central journal article supplement (PMC5054339)
Supplement: 10.1074_M116.059915_mcp.M116.059915-1.pdf [file 10.1074_M116.059915_mcp.M116.059915-1.pdf]

**Alpha-, beta- and gamma-synuclein quantification in cerebrospinal fluid by multiple reaction monitoring reveals increased concentrations in Alzheimer´s and Creutzfeldt-Jakob disease but no alteration in synucleinopathies**

Patrick Oeckl, Fabian Metzger, Magdalena Nagl, Christine A.F. von Arnim, Steffen Halbgebauer, Petra Steinacker, Albert C. Ludolph, Markus Otto

Department of Neurology, Ulm University Hospital, Oberer Eselsberg 45, 89081 Ulm, Germany

**Supplement tables and figures**

**Supplement table 1.** Composition and characteristics of calibration standards, QC samples and IS solution

| Peptide sequence (position)        | Protein                     | Peptide/protein used for calibration/QCs (internal standard peptide/protein <sup>a</sup> )            | Quantification of stock solution | Concentration in calibration standards (pM)        | Concentration in QC samples (pM) (low,medium,high, CSF-QC) | LOD <sup>b</sup> /LLOQ <sup>c</sup> (pM) | Concentration in IS solution (pM) |
|------------------------------------|-----------------------------|-------------------------------------------------------------------------------------------------------|----------------------------------|----------------------------------------------------|------------------------------------------------------------|------------------------------------------|-----------------------------------|
| MDVFMK (1-6)<br>(1-6)              | $\alpha$ Syn<br>$\beta$ Syn | Rec. $\alpha$ Syn protein<br>Rec. $\beta$ Syn protein<br>(rec. <sup>15</sup> N- $\alpha$ Syn protein) | AAA<br>MRM<br>-                  | 6.52/13.1/26.1/65.2/91.3/<br>131/261/652/1040/1310 | 19.6/78.3/326/n.d.                                         | 1.00 / 6.52                              | -<br>-<br>7500                    |
| Ac-MDVFMK (1-6)<br>(1-6)           | $\alpha$ Syn<br>$\beta$ Syn | Ac-MDVFMKGLSK<br>(Ac-MDVFMKGLSK)                                                                      | AAA<br>-                         | 5.00/10.0/20.0/50.0/70.0/<br>100/200/500/800/1000  | 15.0/60.0/250/25.3                                         | 1.50 / 5.00                              | -<br>-<br>1155                    |
| EGVVA AEK (13-21)<br>(13-21)       | $\alpha$ Syn<br>$\beta$ Syn | Rec. $\alpha$ Syn protein<br>Rec. $\beta$ Syn protein<br>(rec. <sup>15</sup> N- $\alpha$ Syn protein) | AAA<br>MRM<br>-                  | 6.52/13.1/26.1/65.2/91.3/<br>131/261/652/1040/1310 | 19.6/78.3/326/41.5                                         | 0.2 / 6.52                               | -<br>-<br>7500                    |
| QGVAEAGK (24-32)                   | $\alpha$ Syn                | Rec. $\alpha$ Syn protein<br>(rec. <sup>15</sup> N- $\alpha$ Syn protein)                             | AAA<br>-                         | 5.00/10.0/20.0/50.0/70.0/<br>100/200/500/800/1000  | 15.0/60.0/250/19.6                                         | 2.00 / 5.00                              | -<br>-<br>7500                    |
| EGVLYVGSK (35-43)<br>(35-43)       | $\alpha$ Syn<br>$\beta$ Syn | Rec. $\alpha$ Syn protein<br>Rec. $\beta$ Syn protein<br>(rec. <sup>15</sup> N- $\alpha$ Syn protein) | AAA<br>MRM<br>-                  | 6.52/13.1/26.1/65.2/91.3/<br>131/261/652/1040/1310 | 19.6/78.3/326/42.2                                         | 0.5 / 6.52                               | -<br>-<br>7500                    |
| EGVVHGVATVAEK (46-58)              | $\alpha$ Syn                | Rec. $\alpha$ Syn protein<br>(rec. <sup>15</sup> N- $\alpha$ Syn protein)                             | AAA<br>-                         | 5.00/10.0/20.0/50.0/70.0/<br>100/200/500/800/1000  | 15.0/60.0/250/16.6                                         | 0.5 / 5.00                               | -<br>-<br>7500                    |
| EGVVHGVAT(Phospho)VAEK (46-58)     | $\alpha$ Syn                | -<br>(TKEGVVHGVAT(Phospho)VAEKTK)                                                                     | -<br>-                           | -                                                  | -/-/-n.d.                                                  | 320 <sup>d</sup> / -                     | -<br>-<br>32000                   |
| EGVVHGVAT(O-GlcNAc)VAEK (46-58)    | $\alpha$ Syn                | -<br>(TKEGVVHGVAT(O-GlcNAc)VAEKTK)                                                                    | -<br>-                           | -                                                  | -/-/-n.d.                                                  | 38 <sup>d</sup> / -                      | -<br>-<br>7600                    |
| EQVTN VGGAVVTGVTAVAQK (61-80)      | $\alpha$ Syn                | Rec. $\alpha$ Syn protein<br>(rec. <sup>15</sup> N- $\alpha$ Syn protein)                             | AAA<br>-                         | 5.00/10.0/20.0/50.0/70.0/<br>100/200/500/800/1000  | 15.0/60.0/250/13.4                                         | 2.00 / 5.00                              | -<br>-<br>7500                    |
| TVEGAGSIAAATGFVK (81-96)           | $\alpha$ Syn                | Rec. $\alpha$ Syn protein<br>(rec. <sup>15</sup> N- $\alpha$ Syn protein)                             | AAA<br>-                         | 5.00/10.0/20.0/50.0/70.0/<br>100/200/500/800/1000  | 15.0/60.0/250/13.1                                         | 1.00 / 5.00                              | -<br>-<br>7500                    |
| TVEGAGS(Phospho)IAAATGFVK (81-96)  | $\alpha$ Syn                | TVEGAGS(Phospho)IAAATGFVK<br>(QKTVEGAGS(Phospho)IAAATGFVKKD)                                          | AAA<br>-                         | 5.00/10.0/20.0/50.0/70.0/<br>100/200/500/800/1000  | 15.0/60.0/250/n.d.                                         | 325 <sup>d</sup> / -                     | -<br>-<br>2275                    |
| TVEGAGS(O-GlcNAc)IAAATGFVK (81-96) | $\alpha$ Syn                | TVEGAGS(O-GlcNAc)IAAATGFVK<br>(QKTVEGAGS(O-GlcNAc)IAAATGFVKKD)                                        | AAA<br>-                         | 5.00/10.0/20.0/50.0/70.0/<br>100/200/500/800/1000  | 15.0/60.0/250/n.d.                                         | 2.50 / 5.00                              | -<br>-<br>1200                    |
| EGYQDY EPEA (103-112)              | $\alpha$ Syn112             | -<br>(GKEGYQDY EPEA)                                                                                  | -<br>-                           | -                                                  | -/-/-n.d.                                                  | 13 <sup>d</sup> / -                      | -<br>-<br>14000                   |
| EGVLYVVAEK (35-44)                 | $\alpha$ Syn126             | -<br>(TKEGVLYVVAEKTK)                                                                                 | -<br>-                           | -                                                  | -/-/-n.d.                                                  | 1.5 <sup>d</sup> / -                     | -<br>-<br>875                     |
| EGVVQGVASVAEK (46-58) <sup>e</sup> | $\beta$ Syn                 | Rec. $\beta$ Syn protein<br>(TREGVVQGVASVAEKTK)                                                       | MRM<br>-                         | 1.52/3.05/6.10/15.2/21.3/<br>30.5/61.0/152/244/305 | 4.57/18.3/76.2/77.8                                        | - / - <sup>e</sup>                       | -<br>-<br>6000                    |
| EQASHLGGAVFSGAGNIAAATGLVK (61-85)  | $\beta$ Syn                 | Rec. $\beta$ Syn protein<br>(TKEQASHLGGAVFSGAGNIAAATGLVKRE)                                           | MRM<br>-                         | 1.52/3.05/6.10/15.2/21.3/<br>30.5/61.0/152/244/305 | 4.57/18.3/76.2/13.9                                        | 0.5 / 1.52                               | -<br>-<br>1500                    |
| ENNVQSVTSVAEK (46-58)              | $\gamma$ Syn                | Rec. $\gamma$ Syn protein<br>(TKENVVQSVTSVAEKTK)                                                      | -<br>-                           | -/-/40.0/100/140/200/400/<br>1000/1600/2000        | -/120/500/286                                              | 10.0 / 40.0                              | -<br>-<br>2250                    |
| TVEEAENIAVTSGVVR (81-96)           | $\gamma$ Syn                | Rec. $\gamma$ Syn protein<br>(TKTVEEAENIAVTSGVVRKE)                                                   | -<br>-                           | -/-/40.0/100/140/200/400/<br>1000/1600/2000        | -/120/500/437                                              | 32 / 40.0                                | -<br>-<br>3720                    |

|                       |     |                      |          |   |   |                 |            |
|-----------------------|-----|----------------------|----------|---|---|-----------------|------------|
| VNVDEVGGEALGR (19-31) | Hbb | -<br>(VNVDEVGGEALGR) | -<br>AAA | - | - | 50 <sup>d</sup> | -<br>31250 |
|-----------------------|-----|----------------------|----------|---|---|-----------------|------------|

AAA: amino acid analysis, Hbb: hemoglobin beta subunit, IS: internal standard, LLOQ: lower limit of quantification, LOD: limit of detection, n.d. not detectable, QC: quality control sample

<sup>a</sup>stable-labeled amino acids are highlighted in bold and are A(<sup>13</sup>C<sub>3</sub>; <sup>15</sup>N), E(<sup>13</sup>C<sub>5</sub>; <sup>15</sup>N), K(<sup>13</sup>C<sub>6</sub>; <sup>15</sup>N<sub>2</sub>) and R(<sup>13</sup>C<sub>6</sub>; <sup>15</sup>N<sub>4</sub>)

<sup>b</sup>LOD is estimated from the LLOQ value applying an signal-to-noise ratio of 3

<sup>c</sup>the mentioned LLOQ value is the lowest value tested and does not mean that a lower LLOQ is not possible

<sup>d</sup>estimated from IS intensity

<sup>e</sup>this peptide was excluded from quantification, because data from method validation (see Results section) indicate interference.

**Supplement table 2.** LC gradient settings

| Agilent 1260 (loading pump)<br>Flow rate: 200 $\mu$ L/min <sup>a</sup> |      | Eksigent MicroLC200<br>Flow rate: 15 $\mu$ L/min <sup>a</sup> |                      |            |                      |
|------------------------------------------------------------------------|------|---------------------------------------------------------------|----------------------|------------|----------------------|
| All fractions                                                          |      | Fractions 1, 3, 4                                             |                      | Fraction 2 |                      |
| Time (min)                                                             | %B   | Time (min)                                                    | %B                   | Time (min) | %B                   |
| 0.0                                                                    | 1.0  | 0.0                                                           | 5.0                  | 0.0        | 1.0                  |
| 0.5                                                                    | 1.0  | 0.25                                                          | Switching valve:     | 0.25       | Switching valve:     |
| 2.0                                                                    | 30.0 |                                                               | Columns connected    |            | Columns connected    |
| 10.2                                                                   | 30.0 | 10.0                                                          | Switching valve:     | 10.0       | Switching valve:     |
| 11.0                                                                   | 80.0 |                                                               | Columns disconnected |            | Columns disconnected |
| 12.0                                                                   | 80.0 | 10.1                                                          | 30.0                 | 10.1       | 30.0                 |
| 12.1                                                                   | 1.0  | 10.3                                                          | 98.0                 | 10.3       | 98.0                 |
| 13.5                                                                   | 1.0  | 11.5                                                          | 98.0                 | 11.5       | 98.0                 |
|                                                                        |      | 11.6                                                          | 5.0                  | 11.6       | 1.0                  |
|                                                                        |      | 13.5                                                          | 5.0                  | 13.5       | 1.0                  |

<sup>a</sup>A pre-run equilibration time of 30s with initial flow rate settings was applied

**Supplement table 3.** MS parameters for scheduled MRM  
(Ion source temperature was 175°C and CAD gas was set to “High” for all peptides)

| Peptide sequence (position)        | Protein                     | Precursor mass<br>(labeled peptide) | z  | Product ion mass<br>(labeled peptide)                                              | Volt.<br>(V) | CUR | GS1 | GS2 | DP   | CE                   | CXP                  | MRM<br>window<br>(s) | Dwell<br>weight<br>(labeled<br>peptide)          | TST<br>(s)               | RT<br>(min) |
|------------------------------------|-----------------------------|-------------------------------------|----|------------------------------------------------------------------------------------|--------------|-----|-----|-----|------|----------------------|----------------------|----------------------|--------------------------------------------------|--------------------------|-------------|
| MDVFMK (1-6)<br>(1-6)              | $\alpha$ Syn<br>$\beta$ Syn | 385.7 (389.2)                       | 2+ | 639.3 (645.3), y5<br>425.2 (429.2), y3                                             | 5100         | 30  | 20  | 30  | 80   | 19<br>23             | 34<br>26             | 40<br>40             | 1.0 (0.2)<br>1.0 (0.2)                           | 0.3<br>0.3               | 5.1         |
| Ac-MDVFMK (1-6)<br>(1-6)           | $\alpha$ Syn<br>$\beta$ Syn | 812.4 (820.4)                       | 1+ | 388.2 (388.2), b3<br>425.2 (433.2), y3                                             | 5500         | 30  | 35  | 30  | 100  | 49<br>47             | 23<br>23             | 80<br>80             | 1.0 (0.2)<br>1.0 (0.2)                           | 0.35<br>0.35             | 9.2         |
| EGVVAAEK (13-21)<br>(13-21)        | $\alpha$ Syn<br>$\beta$ Syn | 437.2 (442.2)                       | 2+ | 489.3 (495.3), y5<br>588.3 (595.3), y6<br>347.2 (351.2), y3                        | 4900         | 30  | 20  | 30  | 63.0 | 18<br>20<br>18       | 27<br>30<br>23       | 50<br>50<br>50       | 1.0 (0.2)<br>1.0 (0.2)<br>1.0 (0.2)              | 0.2<br>0.2<br>0.2        | 3.5         |
| QGVAAEAGK (24-32)                  | $\alpha$ Syn                | 415.7 (421.2)                       | 2+ | 346.2 (351.2), y6<br>546.3 (553.3), y4                                             | 4900         | 30  | 20  | 30  | 61.4 | 21<br>21             | 21<br>29             | 110<br>110           | 1.0 (0.2)<br>1.0 (0.2)                           | 0.2<br>0.2               | 2.1         |
| EGVLYVGSK (35-43)<br>(35-43)       | $\alpha$ Syn<br>$\beta$ Syn | 476.3 (481.3)                       | 2+ | 553.3 (559.3), y5<br>291.2 (295.2), y3                                             | 5500         | 30  | 40  | 30  | 75   | 20<br>21             | 27<br>18             | 120<br>120           | 1.0 (0.2)<br>1.0 (0.2)                           | 0.4<br>0.4               | 4.4         |
| EGVVHGVATVAEK (46-58)              | $\alpha$ Syn                | 648.4 (656.3)                       | 2+ | 774.4 (783.4), y8<br>911.5 (923.5), y9                                             | 5100         | 30  | 20  | 30  | 100  | 35<br>34             | 41<br>50             | 120<br>120           | 1.0 (0.2)<br>1.0 (0.2)                           | 0.3<br>0.3               | 3.4         |
| EGVVHGVAT(Phospho)VAEK (46-58)     | $\alpha$ Syn                | 688.3 (692.3)                       | 2+ | 522.3 (522.3), b5<br>854.4 (862.4), y8<br>446.3 (454.3), y4                        | 5500         | 30  | 40  | 30  | 120  | 37<br>35<br>39       | 28<br>45<br>29       | 40<br>40<br>40       | 1.0 (0.2)<br>1.0 (0.2)<br>1.0 (0.2)              | 0.4<br>0.4<br>0.4        | 6.1         |
| EGVVHGVAT(O-GlcNAc)VAEK (46-58)    | $\alpha$ Syn                | 749.9 (753.9)                       | 2+ | 522.3 (522.3), b5<br>678.4 (678.4), b7<br>977.5 (985.5), y8<br>204.1 (oxonium ion) | 5500         | 30  | 40  | 30  | 110  | 38<br>46<br>35<br>38 | 28<br>31<br>50<br>25 | 40<br>40<br>40<br>40 | 1.0 (0.2)<br>1.0 (0.2)<br>1.0 (0.2)<br>1.0 (0.2) | 0.4<br>0.4<br>0.4<br>0.4 | 3.1         |
| EQVTNVGGAVVTGVTAVAQK (61-80)       | $\alpha$ Syn                | 964.5 (976.5)                       | 2+ | 973.6 (985.5), y10<br>874.5 (885.5), y9<br>1072.7 (1085.6), y11                    | 5500         | 30  | 35  | 30  | 120  | 44<br>44<br>44       | 50<br>50<br>53       | 40<br>40<br>40       | 1.0 (0.2)<br>1.0 (0.2)<br>1.0 (0.2)              | 0.35<br>0.35<br>0.35     | 7.9         |
| TVEGAGSIAAATGFVK (81-96)           | $\alpha$ Syn                | 739.9 (748.4)                       | 2+ | 764.4 (773.4), y8<br>1021.6 (1033.5), y11<br>693.4 (701.4), y7                     | 5500         | 30  | 40  | 30  | 125  | 34<br>34<br>34       | 40<br>55<br>38       | 40<br>40<br>40       | 1.0 (0.2)<br>1.0 (0.2)<br>1.0 (0.2)              | 0.4<br>0.4<br>0.4        | 6.7         |
| TVEGAGS(Phospho)IAAATGFVK (81-96)  | $\alpha$ Syn                | 779.9 (785.9)                       | 2+ | 764.4 (776.5), Y8<br>693.4 (701.4), y7<br>679.8 (685.8), y14 <sup>2+</sup>         | 5500         | 30  | 35  | 30  | 90   | 34<br>34<br>29       | 42<br>36<br>39       | 40<br>40<br>40       | 1.0 (0.2)<br>1.0 (0.2)<br>1.0 (0.2)              | 0.35<br>0.35<br>0.35     | 7.8         |
| TVEGAGS(O-GlcNAc)IAAATGFVK (81-96) | $\alpha$ Syn                | 841.4 (847.4)                       | 2+ | 764.4 (776.5), y8<br>693.4 (701.4), y7<br>622.4 (626.4), y6<br>204.1 (oxonium ion) | 5500         | 30  | 40  | 30  | 110  | 43<br>46<br>49<br>27 | 39<br>32<br>15<br>13 | 40<br>40<br>40<br>40 | 1.0 (0.2)<br>1.0 (0.2)<br>1.0 (0.2)<br>1.0 (0.2) | 0.4<br>0.4<br>0.4<br>0.4 | 6.3         |
| EGYQDYEPEA (103-112)               | $\alpha$ Syn112             | 1200.5 (1206.5)                     | 1+ | 885.3 (885.3), b7<br>756.3 (756.3), b6<br>851.3 (857.4), y7                        | 5500         | 30  | 35  | 30  | 110  | 52<br>52<br>59       | 43<br>47<br>43       | 40<br>40<br>40       | 1.0 (0.2)<br>1.0 (0.2)<br>1.0 (0.2)              | 0.35<br>0.35<br>0.35     | 5.3         |
| EGVLYVVAEK (35-44)                 | $\alpha$ Syn126             | 553.8 (557.8)                       | 2+ | 708.4 (716.4), y6<br>821.5 (829.5), y7<br>446.3 (454.3), y4                        | 5500         | 30  | 40  | 30  | 80   | 23<br>25<br>28       | 41<br>38<br>28       | 40<br>40<br>40       | 1.0 (0.2)<br>1.0 (0.2)<br>1.0 (0.2)              | 0.4<br>0.4<br>0.4        | 6.0         |

| Peptide sequence (position)       | Protein      | Precursor mass (labeled peptide) | z  | Product ion mass (labeled peptide)                           | Volt. (V) | CUR | GS1 | GS2 | DP  | CE             | CXP            | MRM window (s) | Dwell weight (labeled peptide)      | TST (s)              | RT (min) |
|-----------------------------------|--------------|----------------------------------|----|--------------------------------------------------------------|-----------|-----|-----|-----|-----|----------------|----------------|----------------|-------------------------------------|----------------------|----------|
| EGVVQGVASVAEK (46-58)             | $\beta$ Syn  | 636.8 (640.9)                    | 2+ | 760.4 (768.4), y8<br>888.5 (896.5), y9<br>987.5 (995.6), y10 | 5500      | 30  | 35  | 30  | 90  | 30<br>28<br>28 | 41<br>45<br>52 | 40<br>40<br>40 | 1.0 (0.2)<br>1.0 (0.2)<br>1.0 (0.2) | 0.35<br>0.35<br>0.35 | 7.0      |
| EQASHLGGAVFSGAGNIAAATGLVK (61-85) | $\beta$ Syn  | 776.1 (778.8)                    | 3+ | 730.5 (738.5), Y8<br>798.9 (798.9), b17 <sup>2+</sup>        | 5100      | 30  | 20  | 30  | 110 | 31<br>27       | 38<br>43       | 40<br>40       | 1.0 (0.2)<br>1.0 (0.2)              | 0.3<br>0.3           | 8.1      |
| ENVVQSVTSVAEK (46-58)             | $\gamma$ Syn | 695.4 (699.4)                    | 2+ | 820.4 (828.5), y8<br>1047.6 (1055.6), y10                    | 5500      | 30  | 35  | 30  | 120 | 34<br>34       | 45<br>52       | 40<br>40       | 1.0 (0.2)<br>1.0 (0.2)              | 0.35<br>0.35         | 7.2      |
| TVEEAENIAVTSGVVR (81-96)          | $\gamma$ Syn | 837.4 (842.4)                    | 2+ | 788.5 (798.5), y8<br>717.4 (727.4), y7                       | 5500      | 30  | 40  | 30  | 120 | 46<br>37       | 39<br>38       | 40<br>40       | 1.0 (0.2)<br>1.0 (0.2)              | 0.4<br>0.4           | 6.0      |
| VNVDEVGGEALGR (19-31)             | Hbb          | 657.8 (662.8)                    | 2+ | 659.4 (669.4), y7<br>758.4 (768.4), y8                       | 5500      | 30  | 35  | 30  | 90  | 30<br>31       | 34<br>41       | 40<br>40       | 0.1<br>0.1                          | 0.35<br>0.35         | 6.9      |

CE: collision energy, CUR: curtain gas, CXP: collision cell exit potential, DP: declustering potential, GS1: gas 1 (sheath gas), GS2: gas 2, RT: retention time, TST: target scan time, Volt.: voltage, z: charge state

**Supplement table 4.** Demographic and clinical characteristics of patients

|                                                          | <b>Con</b>          | <b>PD</b>           | <b>PDD</b>                       | <b>LBD</b>                       | <b>PSP</b>          | <b>CBS</b>          | <b>AD</b>                        | <b>CJD</b>                        |
|----------------------------------------------------------|---------------------|---------------------|----------------------------------|----------------------------------|---------------------|---------------------|----------------------------------|-----------------------------------|
| <b>n<sup>a</sup></b>                                     | 37                  | 23                  | 17                               | 10                               | 20                  | 10                  | 19                               | 10                                |
| <b>Gender</b><br>(m/f)                                   | 18/19               | 19/4                | 13/4                             | 6/4                              | 10/10               | 8/2                 | 7/12                             | 3/7                               |
| <b>Age<sup>b</sup></b><br>(years)                        | 53.8<br>(32.0-69.9) | 69.9<br>(55.0-74.4) | 73.3 <sup>c</sup><br>(70.5-76.9) | 73.2 <sup>d</sup><br>(65.2-74.4) | 65.1<br>(61.0-69.3) | 68.9<br>(65.5-73.3) | 69.0<br>(61.0-73.0)              | 67.5<br>(65.3-71.0)               |
| <b>Hoehn &amp; Yahr<sup>e</sup></b>                      | -                   | 2.5<br>(1-4)        | 3<br>(2-5)                       | 2.5<br>(1-4)                     | -                   | -                   | -                                | -                                 |
| <b>CSF <math>\alpha</math>Syn<sup>b</sup></b><br>(pg/mL) | 222<br>(161-260)    | 249<br>(185-339)    | 230<br>(182-300)                 | 185<br>(153-279)                 | 204<br>(165-235)    | 246<br>(156-337)    | 303<br>(247-323)                 | 4083 <sup>f</sup><br>(2211-9389)  |
| <b>CSF <math>\beta</math>Syn<sup>b</sup></b><br>(pg/mL)  | 254<br>(217-334)    | 264<br>(174-380)    | 304<br>(220-529)                 | 291<br>(224-515)                 | 256<br>(199-423)    | 314<br>(207-361)    | 422 <sup>g</sup><br>(353-530)    | 9459 <sup>h</sup><br>(4747-18039) |
| <b>CSF <math>\gamma</math>Syn<sup>b</sup></b><br>(ng/mL) | 4.37<br>(3.05-6.12) | 5.84<br>(4.34-7.89) | 6.01<br>(4.77-10.8)              | 5.55<br>(4.48-10.9)              | 5.91<br>(4.75-7.79) | 5.54<br>(4.96-9.36) | 7.13 <sup>i</sup><br>(6.49-8.02) | 21.9 <sup>j</sup><br>(11.7-32.0)  |
| <b>CSF tau<sup>b</sup></b><br>(pg/mL)                    | 243<br>(148-446)    | 255<br>(172-308)    | 331<br>(188-423)                 | 273<br>(208-507)                 | 242<br>(173-309)    | 260<br>(242-421)    | 531 <sup>k</sup><br>(419-947)    | 6055 <sup>l</sup><br>(3755-12540) |

AD: Alzheimer's disease, CBS: corticobasal syndrome, CJD: Creutzfeldt-Jakob disease, Con: control, f: female, LBD: Lewy body dementia, m: male, PD: Parkinson's disease, PDD: PD dementia, PSP: progressive supranuclear palsy

<sup>a</sup>Patients with hemoglobin >200ng/mL in CSF were excluded for  $\alpha$ Syn and  $\gamma$ Syn analysis

<sup>b</sup>Values are median and interquartile range

<sup>c</sup> $p < 0.001$  vs. Con;  $p < 0.05$  vs. PSP

<sup>d</sup> $p < 0.05$  vs. Con

<sup>e</sup>values are median and range

<sup>f</sup> $p < 0.05$  vs. PD, PDD;  $p < 0.01$  vs. LBD;  $p < 0.001$  vs. Con, PSP

<sup>g</sup> $p < 0.05$  vs. Con

<sup>h</sup> $p < 0.01$  vs. PDD, LBD, CBS;  $p < 0.001$  vs. Con, PD, PSP

<sup>i</sup> $p < 0.05$  vs. Con

<sup>j</sup> $p < 0.05$  vs. PD, PSP;  $p < 0.001$  vs. Con

<sup>k</sup> $p < 0.01$  vs. Con, PSP;  $p < 0.001$  vs. PD

<sup>l</sup> $p < 0.05$  vs. PDD;  $p < 0.01$  vs. Con;  $p < 0.001$  vs. PD, PSP

## Supplement figure 1

### $\alpha/\beta$ Syn1-6 (MDVFMK)

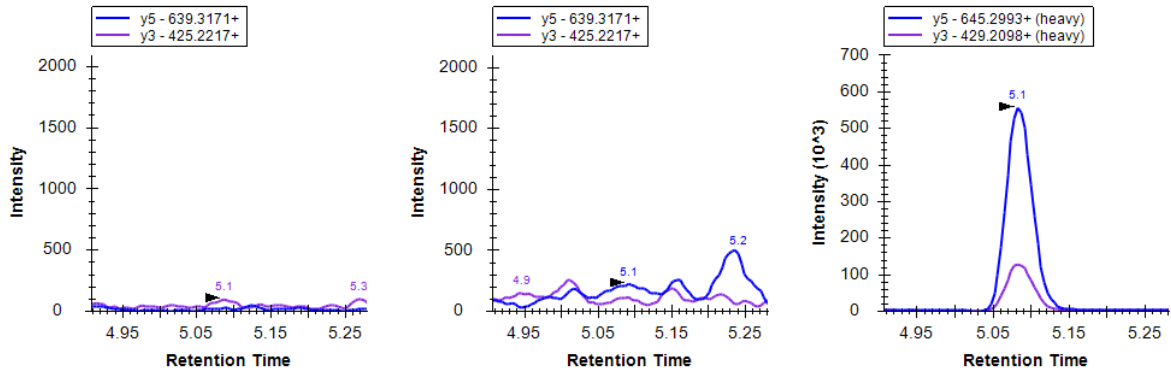

### $\alpha/\beta$ Syn1-6 (Ac-MDVFMK)

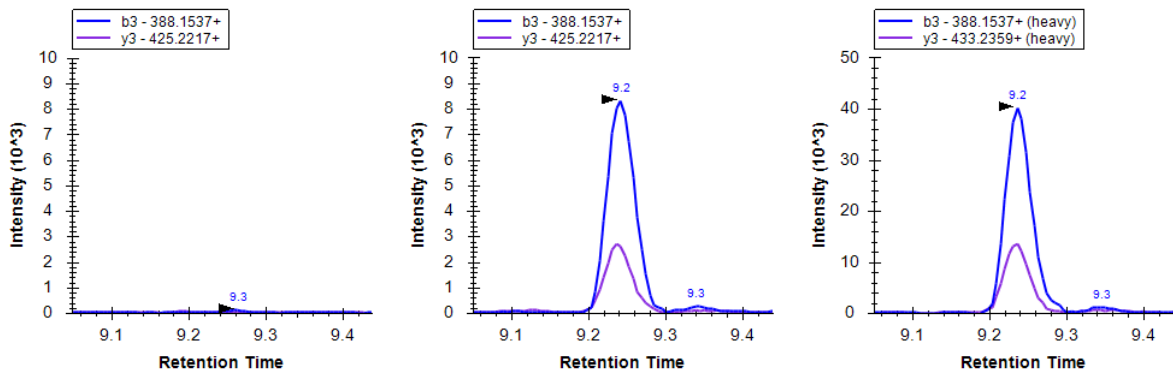

### $\alpha/\beta$ Syn13-21 (EGVAAAEK)

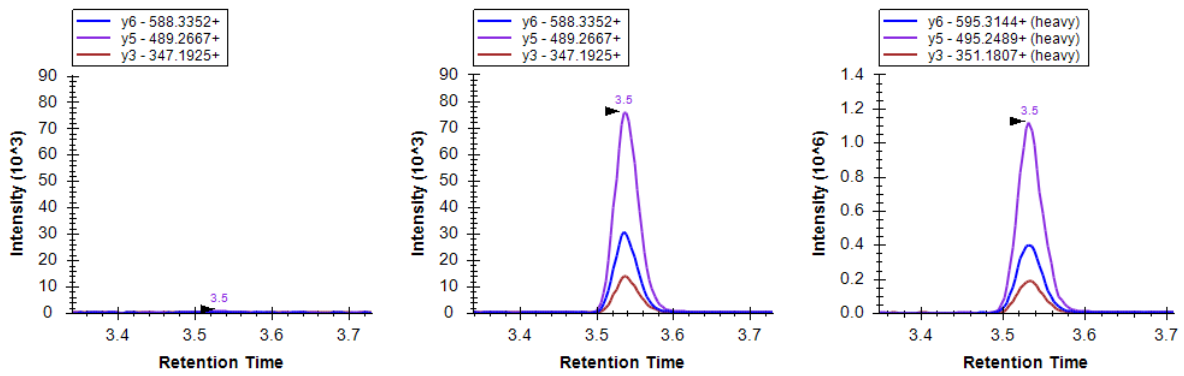

### $\alpha$ Syn24-32 (QGVAEAGK)

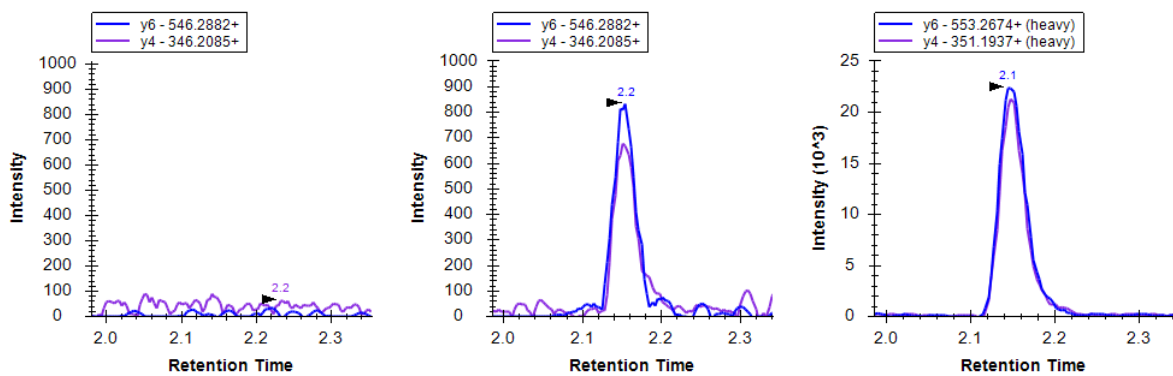



### $\alpha/\beta$ Syn35-43 (EGVLYVGSK)

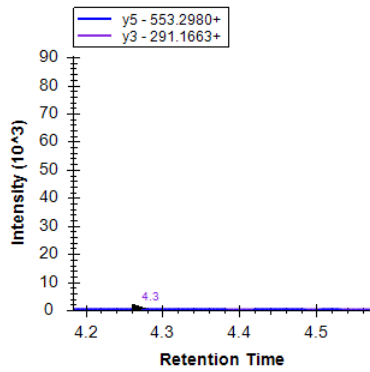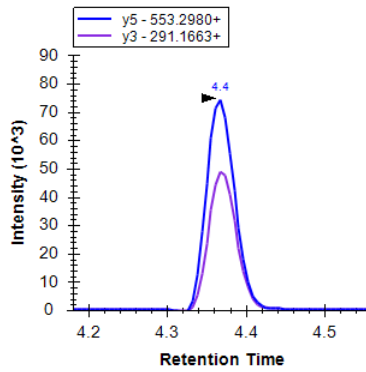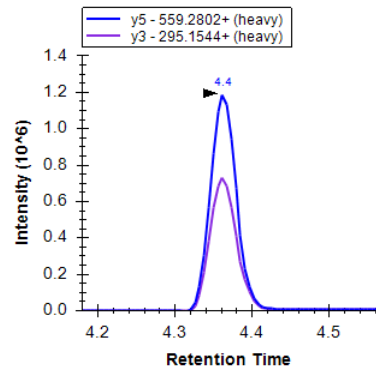

### $\alpha$ Syn46-58 (EGVVHGVATVAEK)

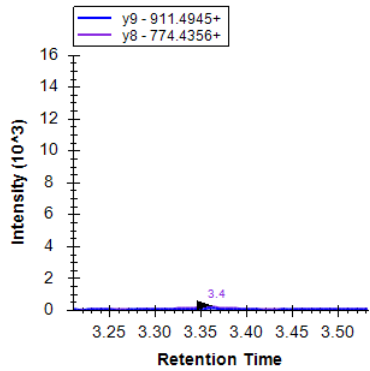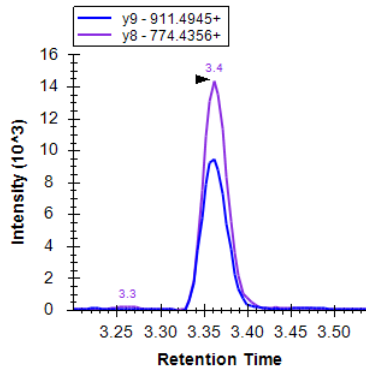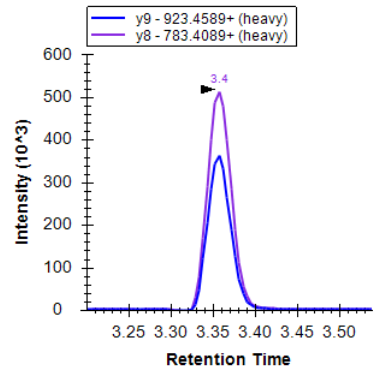

### $\alpha$ Syn61-80 (EQVTNVGGAVVTGVTAVAQK)

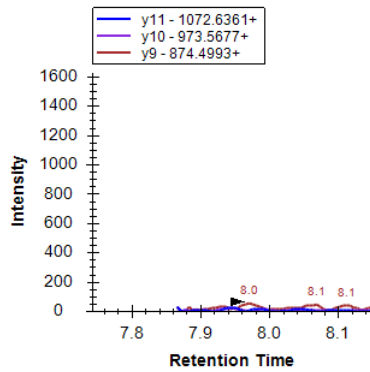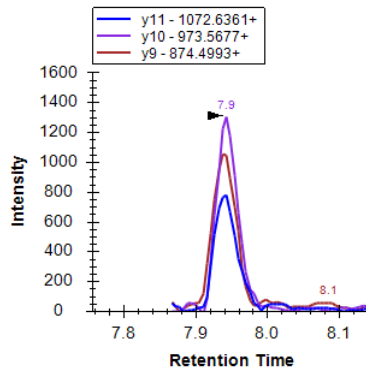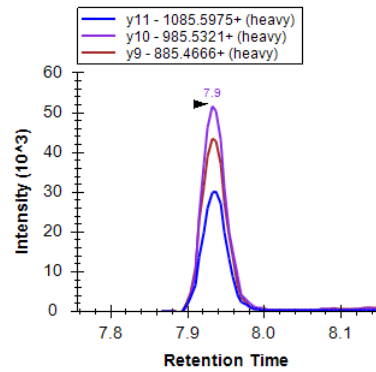

### $\alpha$ Syn81-96 (TVEGAGSIAAATGFVK)

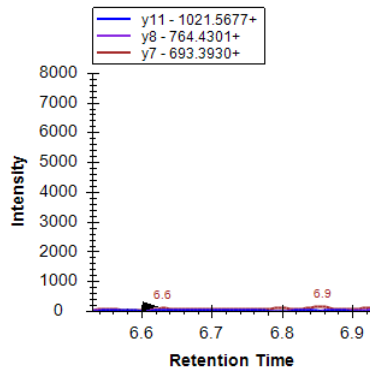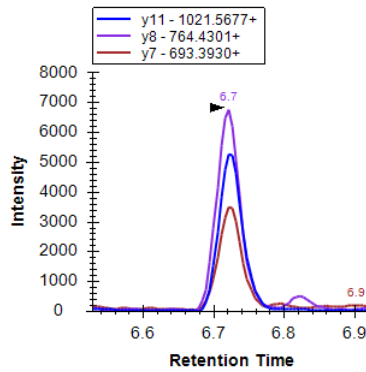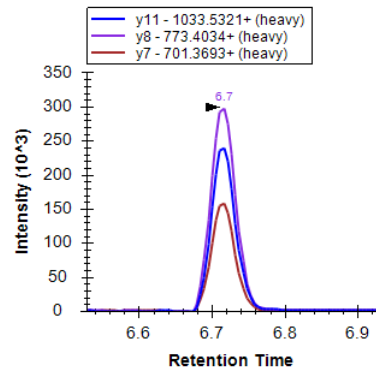

### $\beta$ Syn61-85 (EQASHLGGAVFSGAGNIAAATGLVK)

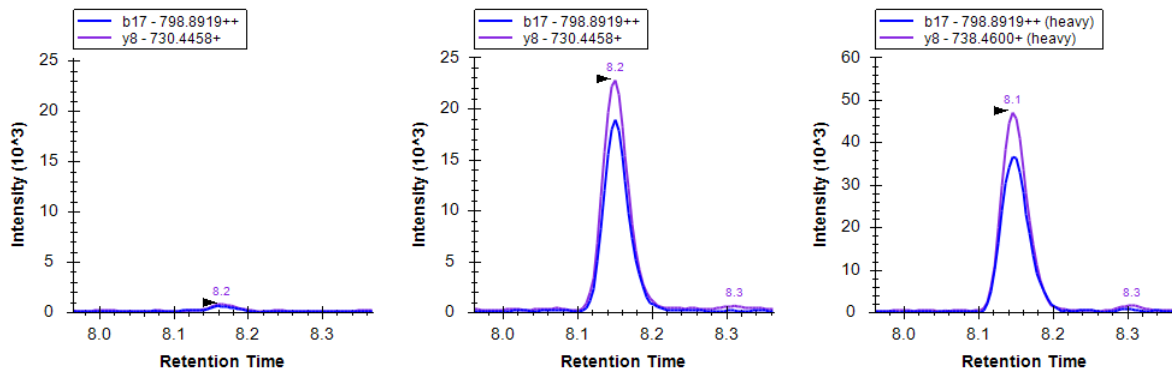

### $\gamma$ Syn46-58 (ENNVQSVTSVAEK)

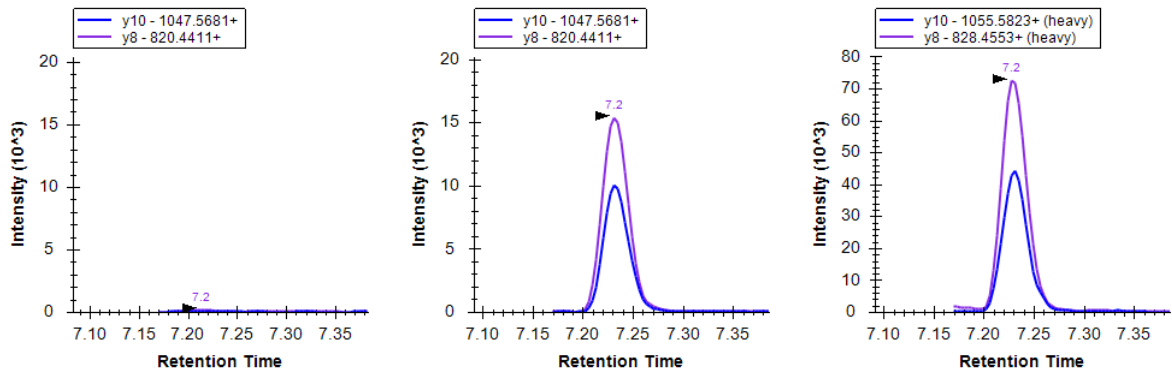

### $\gamma$ Syn81-96 (TVEEAENIAVTSGVVR)

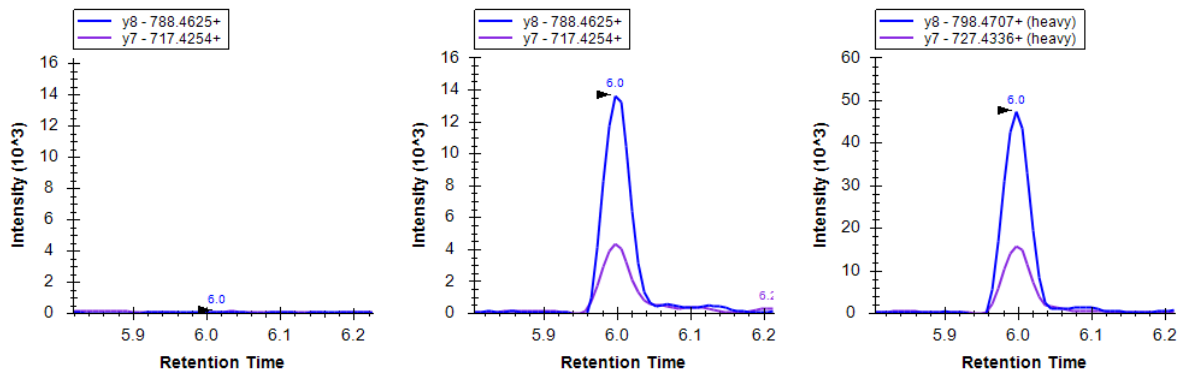

**Supplement figure 1: Representative chromatograms of synuclein peptides.** Chromatograms of peptides that were quantified in CSF in the study are shown. Peptides below the LOD in CSF are not included. The three chromatograms for each peptide are (1) blank sample (aCSF+HSA), (2) CSF sample and (3) heavy-labeled peptide spiked into CSF sample. Chromatograms were extracted from Skyline software 3.1.
